# Supplementary material for: Coronaviruses Are Abundant and Genetically Diverse in West and Central African Bats, including Viruses Closely Related to Human Coronaviruses
Source: MDPI journal article supplement (doi:10.3390/v15020337), 2023-01-25
Supplement: s1 [file s1]

**Supplementary Table S1** : Number of samples collected (N) at the different geographic locations in each country. The location of the different sites is visualized in **Figure 1**.

|                 |          |
|-----------------|----------|
| <b>Guinea</b>   | <b>N</b> |
| Boffa           | 21       |
| Boke            | 49       |
| Conakry         | 175      |
| Faranah         | 48       |
| Forecariah      | 15       |
| Gueckedou       | 71       |
| Kankan          | 110      |
| Kindia          | 224      |
| Kissidougou     | 25       |
| Koundara        | 249      |
| Lola            | 16       |
| Macenta         | 154      |
| Mali            | 119      |
| Maman/Mamou     | 164      |
| Nzerekore       | 11       |
| Siguri          | 58       |
| <b>Cameroon</b> | <b>N</b> |
| Bipindi         | 1138     |
| Campo           | 1        |
| Doumo Pierre    | 41       |
| Mambele         | 268      |
| Mbankomo        | 56       |
| Nkolbisson      | 62       |
| Obala           | 131      |
| Tibati          | 52       |
| Yaoundé         | 462      |
| <b>DRC</b>      |          |
| Beni            | 245      |
| Bikoro          | 136      |
| Butembo         | 33       |
| Iboko           | 76       |
| Ingende         | 44       |
| Mangina         | 79       |
| Mbandaka        | 284      |

**Supplementary Table S2** : Number (n) and percentages (%) of bat genus/species positive for coronaviruses per country and per species.

|                                         | DRC        |                 | Cameroon    |                   | Guinea          |                   | Total       |                   |
|-----------------------------------------|------------|-----------------|-------------|-------------------|-----------------|-------------------|-------------|-------------------|
|                                         | n tested   | n pos (%)       | n tested    | n pos (%)         | n tested        | n pos (%)         | n tested    | n (%)             |
| <b>Frugivorous bats</b>                 |            |                 |             |                   |                 |                   |             |                   |
| <b><i>Pteropodidae</i></b>              |            |                 |             |                   |                 |                   |             |                   |
| <i>Casinycteris arginnis</i>            | 22         | 0 (0)           | 2           | 0 (0)             | nt <sup>d</sup> | nt                | 24          | 0 (0)             |
| <i>Eidolon helvum</i>                   | 56         | 12 (21.4)       | 500         | 211 (42.2)        | 177             | 70 (39.5)         | 733         | 293 (39.9)        |
| <i>Epomophorus</i> sp. <sup>a</sup>     | 258        | 9 (3.5)         | nt          | nt                | 479             | 63 (13.2)         | 737         | 72 (9.8)          |
| <i>Epomops</i> sp. <sup>b</sup>         | 210        | 3 (1.4)         | 28          | 2 (7.1)           | 20              | 3 (15.0)          | 258         | 8 (3.1)           |
| <i>Hypsignathus monstrosus</i>          | 8          | 0 (0)           | 76          | 9 (11.8)          | 19              | 3 (15.8)          | 103         | 12 (11.7)         |
| <i>Lissonycteris angolensis</i>         | 10         | 0 (0)           | 9           | 0 (0)             | 46              | 2 (4.3)           | 65          | 2 (3.1)           |
| <i>Megaloglossus woermanni</i>          | 12         | 2 (6.7)         | 3           | 0 (0)             | nt              | nt                | 15          | 2 (13.3)          |
| <i>Micropteropus pusillus</i>           | 147        | 4 (2.7)         | 2           | 0 (0)             | 16              | 1 (6.3)           | 165         | 5 (3.0)           |
| <i>Myonycteris torquata</i>             | 86         | 6 (7.1)         | 4           | 0 (0)             | 1               | 0 (0)             | 91          | 6 (6.6)           |
| <i>Nanonycteris</i> sp. <sup>c</sup>    | nt         | nt              | nt          | nt                | 3               | 1 (33.3)          | 3           | 1 (33.3)          |
| <i>Rousettus aegyptiacus</i>            | nt         | nt              | 226         | 49 (21.7)         | 565             | 65 (11.5)         | 791         | 114 (14.4)        |
| <i>Scotonycteris bergmansi</i>          | 1          | 0 (0)           | nt          | nt                | nt              | nt                | 1           | 0 (0)             |
| <b>subtotal</b>                         | <b>810</b> | <b>36 (4.4)</b> | <b>850</b>  | <b>271 (31.9)</b> | <b>1326</b>     | <b>208 (15.7)</b> | <b>2986</b> | <b>515 (17.2)</b> |
| <b>Insectivorous bats</b>               |            |                 |             |                   |                 |                   |             |                   |
| <b><i>Emballonuridae</i></b>            |            |                 |             |                   |                 |                   |             |                   |
| <i>Coleura afra</i>                     | nt         | nt              | 1           | 1 (100)           | nt              | nt                | 1           | 1 (100)           |
| <b><i>Hipposideridae</i></b>            |            |                 |             |                   |                 |                   |             |                   |
| <i>Hipposideros</i> sp. <sup>c</sup>    | 47         | 0 (0)           | 206         | 51 (24.8)         | 38              | 10 (26.3)         | 291         | 61 (20.9)         |
| <b><i>Miniopteridae</i></b>             |            |                 |             |                   |                 |                   |             |                   |
| <i>Miniopterus</i> sp. <sup>c</sup>     | nt         | nt              | 9           | 9 (100)           | nt              | nt                | 9           | 9 (100)           |
| <b><i>Molossidae</i></b>                |            |                 |             |                   |                 |                   |             |                   |
| <i>Chaerephon</i> sp. <sup>c</sup>      | 3          | 0 (0)           | nt          | nt                | 9               | 0 (0)             | 12          | 0 (0)             |
| <i>Mops</i> sp. <sup>c</sup>            | 21         | 0 (0)           | 235         | 6 (2.6)           | nt              | nt                | 256         | 6 (2.3)           |
| <i>Mops/Chaerephon</i> sp. <sup>c</sup> | 13         | 0 (0)           | 104         | 0 (0)             | 14              | 4 (28.6)          | 131         | 4 (3.1)           |
| <b><i>Nycteridae</i></b>                |            |                 |             |                   |                 |                   |             |                   |
| <i>Nycteris</i> sp. <sup>c</sup>        | nt         | nt              | nt          | nt                | 5               | 1 (20.0)          | 5           | 1 (20)            |
| <b><i>Rhinolophidae</i></b>             |            |                 |             |                   |                 |                   |             |                   |
| <i>Rhinolophus</i> sp.                  | nt         | nt              | 786         | 289 (36.8)        | 113             | 17 (15.0)         | 899         | 306 (34.1)        |
| <b><i>Vespertilionidae</i></b>          |            |                 |             |                   |                 |                   |             |                   |
| <i>Myotis</i> sp. <sup>c</sup>          | 3          | 0 (0)           | nt          | nt                | 1               | 0 (0)             | 4           | 0 (0)             |
| <i>Scotophilus</i> sp. <sup>c</sup>     | nt         | nt              | nt          | nt                | 3               | 0 (0)             | 3           | 0 (0)             |
| <b>subtotal</b>                         | <b>87</b>  | <b>0 (0)</b>    | <b>1341</b> | <b>356 (26.5)</b> | <b>183</b>      | <b>32 (17.5)</b>  | <b>1611</b> | <b>388 (24.1)</b> |
| <b>Total</b>                            | <b>897</b> | <b>36 (4.0)</b> | <b>2191</b> | <b>627 (28.6)</b> | <b>1509</b>     | <b>240 (15.9)</b> | <b>4597</b> | <b>903 (19.6)</b> |

<sup>a</sup> Two *Epomophorus* species were observed, *E. gambianus* in Guinea, Cameroon and Western DRC and *E. labiatus* in Eastern DRC.

<sup>b</sup> Two *Epomops* species were observed, *E. franqueti* in Cameroon and DRC and *E. buettikoferi* in Guinea.

<sup>c</sup> Identification at species level was not possible for a significant proportion of samples tested and were therefore grouped at the genus level.

<sup>d</sup> nt: not tested

**Supplementary Table S3:** Number (n) and proportion (%) of alpha and beta coronaviruses per bat genus/species, and p-values resulting from comparison of the proportions between alpha and betacoronavirus per genus/species, when applicable ( $\chi^2$  test).

|                                         | Sequences<br>n | alpha coronavirus<br>n pos (%) | beta coronavirus<br>n pos (%) | p-value<br>$\chi^2$ test     |
|-----------------------------------------|----------------|--------------------------------|-------------------------------|------------------------------|
| <b>Frugivorous bats</b>                 |                |                                |                               |                              |
| <b><i>Pteropodidae</i></b>              |                |                                |                               |                              |
| <i>Eidolon helvum</i>                   | 238            | 2 (0.8)                        | 236 (99.2)                    | <10 <sup>-4</sup> *          |
| <i>Epomophorus</i> sp. <sup>a</sup>     | 55             | 2 (3.6)                        | 53 (96.4)                     | <10 <sup>-4</sup> *          |
| <i>Epomops</i> sp. <sup>b</sup>         | 5              | 0 (0.0)                        | 5 (100)                       | na <sup>d</sup>              |
| <i>Hypsignathus monstrosus</i>          | 10             | 0 (0.0)                        | 10 (100)                      | na                           |
| <i>Lissonycteris angolensis</i>         | 2              | 1 (50.0)                       | 1 (50.0)                      | na                           |
| <i>Megaloglossus woermanni</i>          | 2              | 0 (0.0)                        | 2 (100)                       | na                           |
| <i>Micropteropus pusillus</i>           | 5              | 0 (0.0)                        | 5 (100)                       | na                           |
| <i>Myonycteris torquata</i>             | 6              | 0 (0.0)                        | 6 (100)                       | na                           |
| <i>Nanonycteris</i> sp. <sup>c</sup>    | 1              | 0 (0.0)                        | 1 (100)                       | na                           |
| <i>Rousettus aegyptiacus</i>            | 97             | 21 (21.6)                      | 76 (78.4)                     | <10 <sup>-4</sup> *          |
| <b>subtotal frugivorous bats</b>        | <b>421</b>     | <b>26 (6.2%)</b>               | <b>395 (93.8%)</b>            | <b>0.0029*</b>               |
| <b>Insectivorous bats</b>               |                |                                |                               |                              |
| <b><i>Emballonuridae</i></b>            |                |                                |                               |                              |
| <i>Coleura afra</i>                     | 1              | 1 (100)                        | 0 (0.0)                       | na                           |
| <b><i>Hipposideridae</i></b>            |                |                                |                               |                              |
| <i>Hipposideros</i> sp. <sup>c</sup>    | 53             | 16 (30.2)                      | 37 (69.8)                     | na                           |
| <b><i>Miniopteridae</i></b>             |                |                                |                               |                              |
| <i>Miniopterus</i> sp. <sup>c</sup>     | 7              | 7 (100)                        | 0 (0.0)                       | na                           |
| <b><i>Molossidae</i></b>                |                |                                |                               |                              |
| <i>Mops</i> sp. <sup>c</sup>            | 6              | 3 (50.0)                       | 3 (50.0)                      | na                           |
| <i>Mops/Chaerephon</i> sp. <sup>c</sup> | 4              | 0 (0.0)                        | 4 (100)                       | na                           |
| <b><i>Nycteridae</i></b>                |                |                                |                               |                              |
| <i>Nycteris</i> sp. <sup>c</sup>        | 1              | 0 (0.0)                        | 1 (100)                       |                              |
| <b><i>Rhinolophidae</i></b>             |                |                                |                               |                              |
| <i>Rhinolophus</i> sp. <sup>c</sup>     | 275            | 122 (44.4)                     | 153 (55.6)                    | 0.0545, ns <sup>e</sup>      |
| <b>subtotal insectivorous bats</b>      | <b>347</b>     | <b>149 (42.9%)</b>             | <b>198 (57.1%)</b>            | <b>0.44, ns</b>              |
| <b>Total</b>                            | <b>768</b>     | <b>175 (22.8)</b>              | <b>593 (77.2)</b>             | <b>&lt;10<sup>-4</sup> *</b> |

<sup>a</sup> Two *Epomophorus* species were observed, *E. gambianus* in Guinea, Cameroon and Western DRC and *E. labiatus* in Eastern DRC

<sup>b</sup> Two *Epomops* species were observed, *E. franqueti* in Cameroon and DRC and *E. buettikoferi*

<sup>c</sup> Identification at species level was not possible for a significant proportion of samples tested and were therefore grouped at the genus level.

<sup>d</sup> na: non applicable  $\chi^2$  test (numbers too low, or do not exist)

<sup>e</sup> ns : non significant  $\chi^2$  test (p-value>0.05)

\* significant  $\chi^2$  test (p-value<0.05)

**Supplementary Table S4:** Number of bats positive for coronaviruses (n pos) on total number tested (N) and percentages (%) of samples per bat genus/species in Cameroon per age category (adults (A), immature adults (imm) and juveniles (J) and per species). The p-values result from comparison of the proportions of positive per genus/species, when applicable ( $\chi^2$  test).

|                                    | A<br>n pos/N    | A<br>% pos  | imm<br>n pos/N | imm<br>% pos | J<br>n pos/N   | J<br>%pos   | p-value                      |
|------------------------------------|-----------------|-------------|----------------|--------------|----------------|-------------|------------------------------|
| <b>Frugivorous bats</b>            |                 |             |                |              |                |             |                              |
| <b>Pteropodidae</b>                |                 |             |                |              |                |             |                              |
| <i>Casinycteris arginnis</i>       | 0/1             | 0.0         | 0/1            | 0.0          | -              | -           | na <sup>d</sup>              |
| <i>Eidolon helvum</i>              | 41/146          | 28.1        | 89/200         | 44.5         | 80/153         | 52.3        | ns                           |
| <i>Epomops franqueti</i>           | 2/19            | 10.5        | 0/3            | 0.0          | 0/4            | 0.0         | ns                           |
| <i>Hypsignathus monstrosus</i>     | 10/58           | 17.2        | 1/10           | 10           | 2/8            | 25.0        |                              |
| <i>Lissonycteris angolensis</i>    | 0/6             | 0.0         | 0/2            | 0.0          | 0/1            | 0.0         | na                           |
| <i>Megaloglossus woermanni</i>     | 0/2             | 0.0         | 0/1            | 0.0          | -              | -           | na                           |
| <i>Micropteropus pusillus</i>      | 0/1             | 0.0         | 0/1            | 0.0          | -              | -           | na                           |
| <i>Myonycteris torquata</i>        | 0/2             | 0.0         | 0/1            | 0.0          | -              | -           | na                           |
| <i>Rousettus aegyptiacus</i>       | 5/109           | 4.6         | 18/38          | 47.4         | 26/79          | 32.9        | ns                           |
| <b>Subtotal frugivorous bats</b>   | <b>58/344</b>   | <b>16.9</b> | <b>108/257</b> | <b>42</b>    | <b>108/245</b> | <b>44.1</b> | <b>&lt;10<sup>-4</sup> *</b> |
| <b>Insectivorous bats</b>          |                 |             |                |              |                |             |                              |
| <b>Emballonuridae</b>              |                 |             |                |              |                |             |                              |
| <i>Coleura</i> sp.                 | 1/1             | 100         | -              | -            | -              | -           | na                           |
| <b>Hipposideridae</b>              |                 |             |                |              |                |             |                              |
| <i>Hipposideros</i> sp.            | 27/108          | 25.0        | 23/97          | 23.7         | 1/1            | 100         | na                           |
| <b>Miniopteridae</b>               |                 |             |                |              |                |             |                              |
| <i>Miniopterus</i>                 | 3/3             | 100         | 5/5            | 100          | -              | -           | na                           |
| <b>Molossidae</b>                  |                 |             |                |              |                |             |                              |
| <i>Chaerephon</i> sp.              | 0/77            | 0.0         | -              | -            | 0/25           | 0.0         | na                           |
| <i>Mops</i> sp.                    |                 |             |                |              |                |             |                              |
| <b>Rhinolophidae</b>               |                 |             |                |              |                |             |                              |
| <i>Rhinolophus</i> sp.             | 117/411         | 28.5        | 150/347        | 43.2         | 21/26          | 80.7        | ns                           |
| <b>Subtotal insectivorous bats</b> | <b>151/759</b>  | <b>19.9</b> | <b>179/450</b> | <b>39.8</b>  | <b>22/83</b>   | <b>26.5</b> | <b>&lt;10<sup>-4</sup> *</b> |
| <b>Total</b>                       | <b>209/1103</b> | <b>18.9</b> | <b>287/707</b> | <b>40.6</b>  | <b>130/328</b> | <b>39.6</b> | <b>10<sup>-4</sup> *</b>     |

<sup>a</sup> Two *Epomophorus* species were observed, *E. gambianus* in Guinea, Cameroon and Western DRC and *E. labiatus* in Eastern DRC

<sup>b</sup> Two *Epomops* species were observed, *E. franqueti* in Cameroon and DRC and *E. buettikoferi*

<sup>c</sup> Identification at species level was not possible for a significant proportion of samples tested and were therefore grouped at the genus level.

<sup>d</sup> na non applicable (numbers too low or do not exist)

<sup>e</sup> ns : non significant  $\chi^2$  test (p-value>0.05)

\* significant  $\chi^2$  test (p-value<0.05)
